# Supplementary material
Source: PubMed Central journal article supplement (PMC9944762)
Supplement: NEJMc2216309_disclosures.pdf [file NEJMc2216309_disclosures.pdf]

**Discloser Identifier:** 1047164

**Disclosure Purpose:** 22-16309

## Summary of Interests

I do not have any interests to disclose at this time.

## Additional Questions

1. **Are there other relationships or activities that readers could perceive to have influenced, or that give the appearance of potentially influencing, what you wrote in the submitted work?**

No.

2. **What is the manuscript title?**

Immunological Effect from Bivalent mRNA Booster in Hemodialysis Patients

3. **Are you the corresponding author?**

No.

## Certification

I certify that the information provided in this disclosure is complete and accurate.

Marie Bischof

**Discloser Identifier:** 1111797

**Disclosure Purpose:** 22-16309

## Summary of Interests

I do not have any interests to disclose at this time.

## Additional Questions

1. **Are there other relationships or activities that readers could perceive to have influenced, or that give the appearance of potentially influencing, what you wrote in the submitted work?**

No.

2. **What is the manuscript title?**

Immunological Effect from Bivalent mRNA Booster in Hemodialysis Patients

3. **Are you the corresponding author?**

No.

## Certification

I certify that the information provided in this disclosure is complete and accurate.

Christiane Drechsler

**Discloser Identifier:** 1107629

**Disclosure Purpose:** 22-16309

## Summary of Interests

I do not have any interests to disclose at this time.

## Additional Questions

1. **Are there other relationships or activities that readers could perceive to have influenced, or that give the appearance of potentially influencing, what you wrote in the submitted work?**

No.

2. **What is the manuscript title?**

Immunological Effect from Bivalent mRNA Booster in Hemodialysis Patients

3. **Are you the corresponding author?**

No.

## Certification

I certify that the information provided in this disclosure is complete and accurate.

Luca Huth

**Discloser Identifier:** 1107759

**Disclosure Purpose:** 22-16309

## Summary of Interests

I do not have any interests to disclose at this time.

## Additional Questions

1. **Are there other relationships or activities that readers could perceive to have influenced, or that give the appearance of potentially influencing, what you wrote in the submitted work?**

No.

2. **What is the manuscript title?**

Immunological Effect from Bivalent mRNA Booster in Hemodialysis Patients

3. **Are you the corresponding author?**

No.

## Certification

I certify that the information provided in this disclosure is complete and accurate.

Oliver Keppler

**Discloser Identifier:** 889104

**Disclosure Purpose:** 22-16309

## Summary of Interests

I do not have any interests to disclose at this time.

## Additional Questions

1. **Are there other relationships or activities that readers could perceive to have influenced, or that give the appearance of potentially influencing, what you wrote in the submitted work?**

No.

2. **What is the manuscript title?**

Immunological Effect from Bivalent mRNA Booster in Hemodialysis Patients

3. **Are you the corresponding author?**

No.

## Certification

I certify that the information provided in this disclosure is complete and accurate.

Gaia Lupoli

**Discloser Identifier:** 1111796

**Disclosure Purpose:** 22-16309

## Summary of Interests

I do not have any interests to disclose at this time.

## Additional Questions

1. **Are there other relationships or activities that readers could perceive to have influenced, or that give the appearance of potentially influencing, what you wrote in the submitted work?**

No.

2. **What is the manuscript title?**

Immunological Effect from Bivalent mRNA Booster in Hemodialysis Patients

3. **Are you the corresponding author?**

No.

## Certification

I certify that the information provided in this disclosure is complete and accurate.

Discloser Identifier: 1047159

Disclosure Purpose: 22-16309

## Summary of Interests

### Company or Organization

| Entity                                                                                           | Type             | Interest Held By |
|--------------------------------------------------------------------------------------------------|------------------|------------------|
| BioNTech                                                                                         | Consultant       | Self             |
| <i>Category:</i> Consultant<br><i>Description:</i><br><i>Additional Information:</i>             |                  |                  |
| Galapagos                                                                                        | Grant / Contract | Self             |
| <i>Recipient Name:</i><br><i>Grant / Contract Description:</i><br><i>Additional Information:</i> |                  |                  |
| <i>Recipient Type:</i><br><i>Grant / Contract Purpose:</i>                                       |                  |                  |
| Glaxo-Smith-Kline                                                                                | Grant / Contract | Self             |
| <i>Recipient Name:</i><br><i>Grant / Contract Description:</i><br><i>Additional Information:</i> |                  |                  |
| <i>Recipient Type:</i><br><i>Grant / Contract Purpose:</i>                                       |                  |                  |
| Glaxo-Smith-Kline                                                                                | Consultant       | Self             |
| <i>Category:</i> Consultant<br><i>Description:</i><br><i>Additional Information:</i>             |                  |                  |
| Moderna                                                                                          | Consultant       | Self             |
| <i>Category:</i> Consultant<br><i>Description:</i><br><i>Additional Information:</i>             |                  |                  |
| MSD                                                                                              | Grant / Contract | Self             |
| <i>Recipient Name:</i><br><i>Grant / Contract Description:</i><br><i>Additional Information:</i> |                  |                  |
| <i>Recipient Type:</i><br><i>Grant / Contract Purpose:</i>                                       |                  |                  |
| Novartis                                                                                         | Consultant       | Self             |
| <i>Category:</i> Consultant<br><i>Description:</i><br><i>Additional Information:</i>             |                  |                  |
| PFIZER PHARMA GMBH                                                                               | Grant / Contract | Self             |
| <i>Recipient Name:</i><br><i>Grant / Contract Description:</i><br><i>Additional Information:</i> |                  |                  |
| <i>Recipient Type:</i><br><i>Grant / Contract Purpose:</i>                                       |                  |                  |

## Additional Questions

1. **Are there other relationships or activities that readers could perceive to have influenced, or that give the appearance of potentially influencing, what you wrote in the submitted work?**

No.

2. **What is the manuscript title?**

Immunological effect from bivalent mRNA booster in hemodialysis patients

3. **Are you the corresponding author?**

Yes.

- a. **Please list the other authors' names here.**

Luca Huth, Luise Schäfer, Giovanni Almanzar, Gaia Lupoli, Marie Bischof, Paul R. Wratil, Torsten Stövesand, Christiane Drechsler, Oliver T. Keppler, Martina Prelog

## Certification

I certify that the information provided in this disclosure is complete and accurate.



Luise Schäfer

**Discloser Identifier:** 1107760

**Disclosure Purpose:** 22-16309

## Summary of Interests

I do not have any interests to disclose at this time.

## Additional Questions

1. **Are there other relationships or activities that readers could perceive to have influenced, or that give the appearance of potentially influencing, what you wrote in the submitted work?**

No.

2. **What is the manuscript title?**

Immunological Effect from Bivalent mRNA Booster in Hemodialysis Patients

3. **Are you the corresponding author?**

No.

## Certification

I certify that the information provided in this disclosure is complete and accurate.

Torsten Stoevesand

**Discloser Identifier:** 1107761

**Disclosure Purpose:** 22-16309

## Summary of Interests

I do not have any interests to disclose at this time.

## Additional Questions

1. **Are there other relationships or activities that readers could perceive to have influenced, or that give the appearance of potentially influencing, what you wrote in the submitted work?**

No.

2. **What is the manuscript title?**

Immunological Effect from Bivalent mRNA Booster in Hemodialysis Patients

3. **Are you the corresponding author?**

No.

## Certification

I certify that the information provided in this disclosure is complete and accurate.

Paul Wratil

**Discloser Identifier:** 1111798

**Disclosure Purpose:** 22-16309

## Summary of Interests

I do not have any interests to disclose at this time.

## Additional Questions

1. **Are there other relationships or activities that readers could perceive to have influenced, or that give the appearance of potentially influencing, what you wrote in the submitted work?**

No.

2. **What is the manuscript title?**

Immunological Effect from Bivalent mRNA Booster in Hemodialysis Patients

3. **Are you the corresponding author?**

No.

## Certification

I certify that the information provided in this disclosure is complete and accurate.
